# Supplementary material for: Aetiology and outcomes of sepsis in adults in sub-Saharan Africa: a systematic review and meta-analysis
Source: PubMed Central journal article supplement (PMC6558702; doi:10.1186/s13054-019-2501-y), 2019-06-11
Supplement: 13054_2019_2501_MOESM1_ESM.pdf [file 13054_2019_2501_MOESM1_ESM.pdf]

## **MODIFIED NEWCASTLE - OTTAWA QUALITY ASSESSMENT SCALE COHORT STUDIES**

Note: A study can be awarded a maximum of one star for each numbered item within the Selection and Outcome categories. A maximum of two stars can be given for Comparability

### **Selection**

#### 1) Representativeness of the exposed cohort

- a) truly representative of the average adult with sepsis in the community ✱
- b) somewhat representative of the average adult with sepsis in the community ✱
- c) selected group of users eg nurses, volunteers
- d) no description of the derivation of the cohort

#### 2) Ascertainment of exposure – HIV status

- a) reproducible description of valid testing procedures (e.g. following national guidelines) ✱
- b) self reported status
- c) no description

#### 3) Ascertainment of exposure - aetiology

- a) Reproducible description of testing procedures using reference tests ✱
- b) Reproducible description of testing using non-reference tests (e.g Widal test for enteric fever)
- d) no or nonreproducible description of testing

### **Comparability**

#### 1) Comparability of cohorts on the basis of the design or analysis

- a) study reports +/- controls for lactate ✱
- b) study reports +/- controls for any additional physiologic parameters (BP, HR etc) ✱

### **Outcome**

#### 1) Assessment of outcome

a) independent blind assessment \*

b) record linkage \*

c) self report

d) no description

2) Adequacy of follow up of cohorts

a) complete follow up - all subjects accounted for \*

b) subjects lost to follow up unlikely to introduce bias - small number lost - > 90% follow up rate, or description provided of those lost) \*

c) follow up rate < 90% and no description of those lost

d) no statement
