# Supplementary material for: Aetiology and outcomes of sepsis in adults in sub-Saharan Africa: a systematic review and meta-analysis
Source: Springer Nature journal article supplement (doi:10.1186/s13054-019-2501-y), 2019-06-11
Supplement: MOESM2 [file 16797266]

|                      |   |   |   |     |   |   |
|----------------------|---|---|---|-----|---|---|
| Waitt 2015           | 1 | 1 | 1 | 0.5 | 1 | 1 |
| Ssekitoleko 2011 (2) | 1 | 0 | 1 | 1   | 1 | 1 |
| Ssekitoleko 2011 (1) | 1 | 0 | 1 | 0   | 1 | 1 |
| Seboxa 2015          | 1 | 0 | 1 | 0   | 1 | 1 |
| Rudd 2017            | 1 | 0 | 1 | 1   | 1 | 1 |
| Nadjm 2012           | 0 | 1 | 1 | 1   | 1 | 1 |
| Jacob 2012           | 1 | 1 | 1 | 1   | 1 | 1 |
| Jacob 2009           | 1 | 1 | 1 | 1   | 1 | 1 |
| Huson 2015           | 1 | 1 | 1 | 0   | 1 | 1 |
| Chimese 2012         | 1 | 0 | 1 | 1   | 1 | 1 |
| Auma 2013            | 1 | 1 | 1 | 0.5 | 1 | 1 |
| Andrews 2017         | 1 | 1 | 1 | 1   | 1 | 1 |
| Andrews 2014         | 1 | 0 | 1 | 1   | 1 | 1 |
| Amir 2016            | 1 | 1 | 1 | 1   | 1 | 1 |

Selection – representativeness

Selection – exposure (HIV)

Selection – exposure (aetiology)

Comparability

Outcome – assessment

Outcome – follow up
