# Supplementary material for: Aetiology and outcomes of sepsis in adults in sub-Saharan Africa: a systematic review and meta-analysis
Source: Springer Nature journal article supplement (doi:10.1186/s13054-019-2501-y), 2019-06-11

Organism

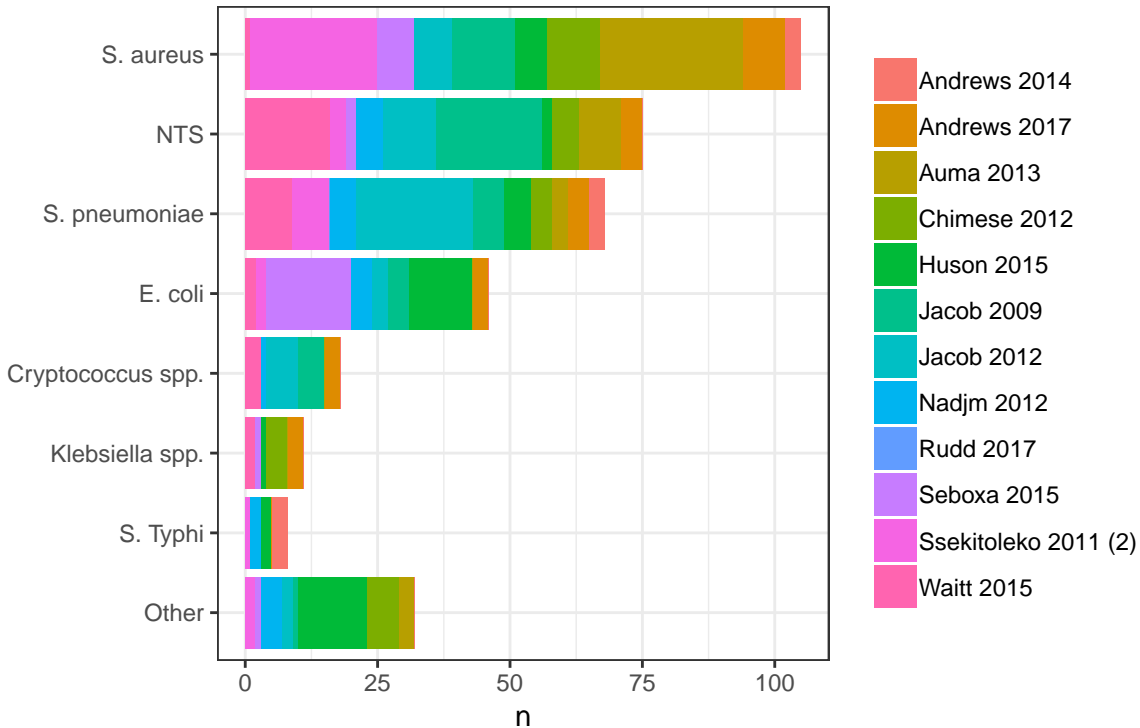

Supplement: MOESM5 [file 16797266]
